# Supplementary material for: RAFT polymerization mediated core–shell supramolecular assembly of PEGMA-co-stearic acid block co-polymer for efficient anticancer drug delivery
Source: Royal Society of Chemistry journal article supplement (doi:10.1039/d1ra01660a), 2021-01-01
Supplement: d1ra01660a1.pdf [file d1ra01660a1.pdf]

# RAFT polymerization mediated core-shell supramolecular assembly of PEGMA-co-Stearic acid block co-polymer for efficient anticancer drug delivery

Priyatosh Sarkar<sup>a</sup>, Santanu Ghosh<sup>a,b</sup>, Rima Saha<sup>a</sup>, Kishor Sarkar<sup>a\*</sup>

<sup>a</sup>Gene Therapy and Tissue Engineering Lab, Department of Polymer Science and  
Technology, University of Calcutta, 92, A.P.C. Road, Kolkata- 700009, India

<sup>b</sup>Department of Materials Engineering, Indian Institute of Science, C.V. Raman Avenue,  
Bangalore, Karnataka- 560012, India

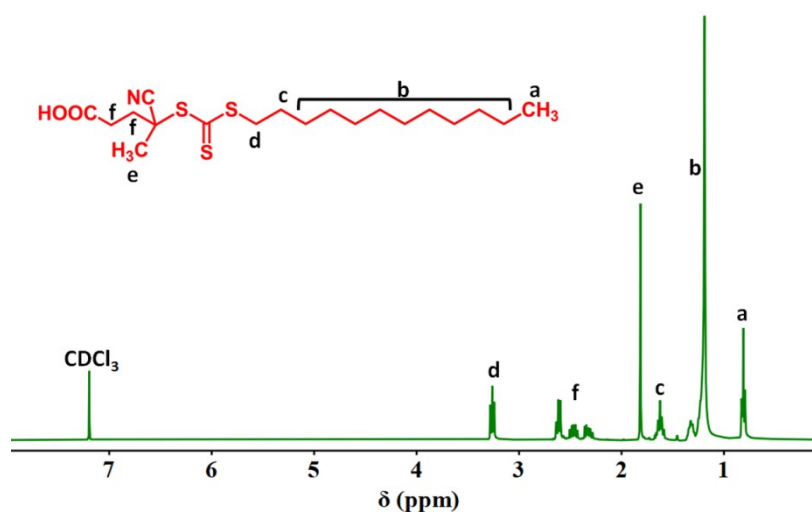

**Fig S1.** <sup>1</sup>H NMR spectra of CDSP

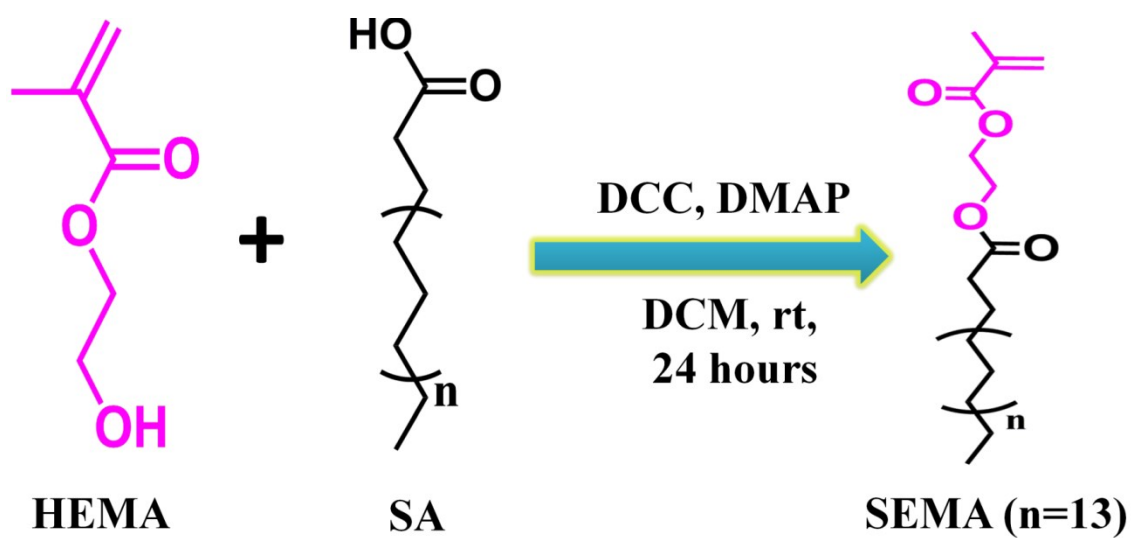

Fig S2. Synthesis scheme for SEMA monomer

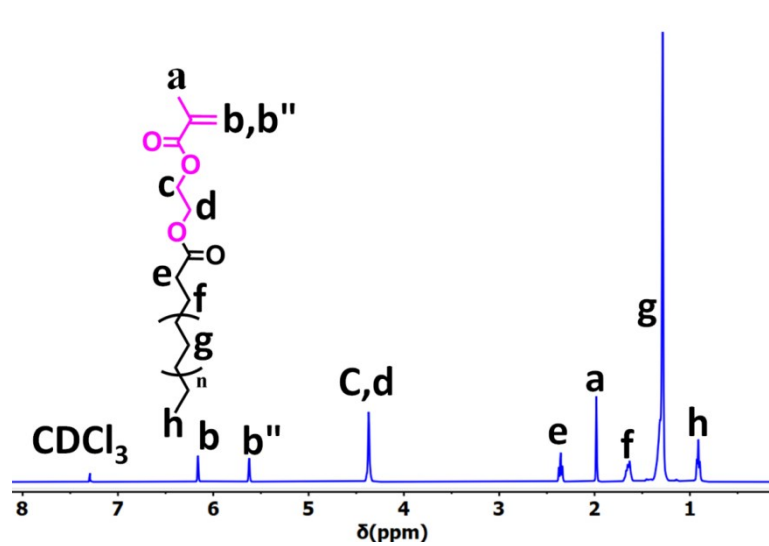

Fig S3. <sup>1</sup>H NMR Spectrum of SEMA monomer

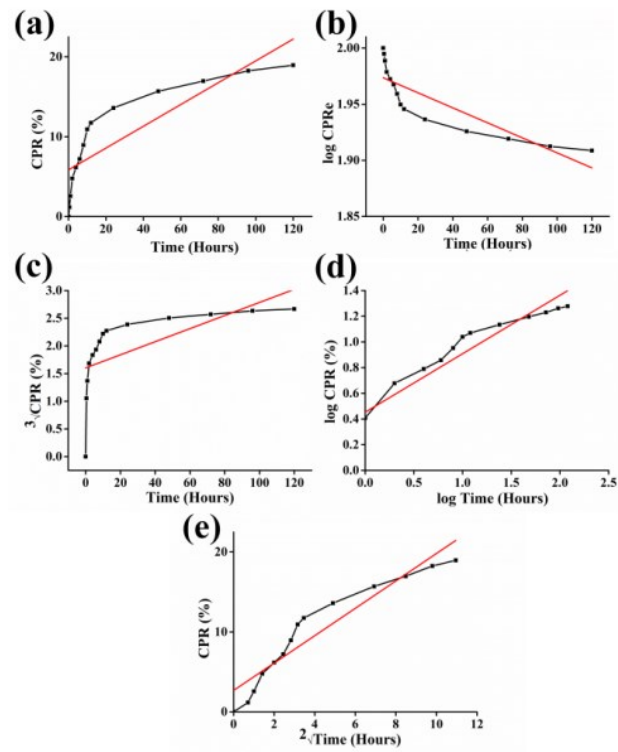

**Fig S4.** Different DOX release kinetics model at pH 7.4; (a) Zero order; (b) First order; (c) Hixon–Crowell; (d) Korsmeyer-Peppas; (e) Higuchi model

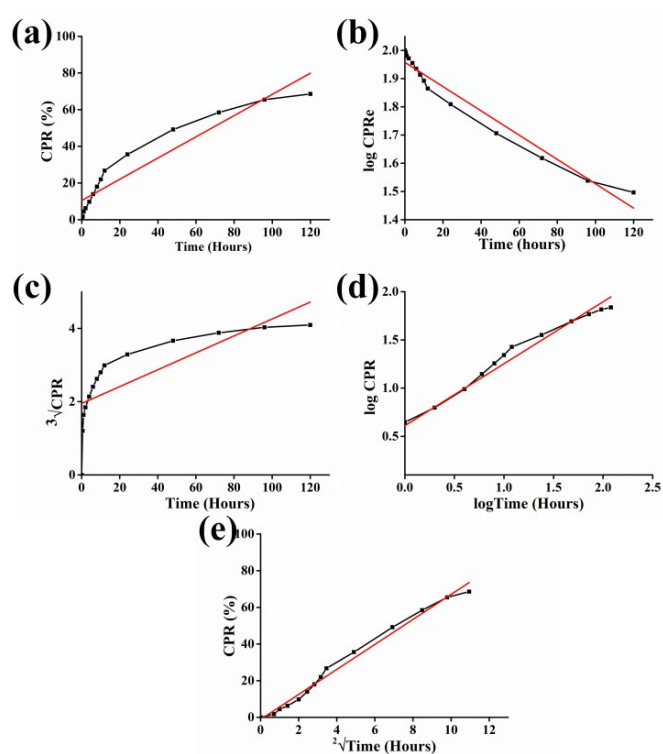

**Fig S5.** Different DOX release kinetics model at pH 5; (a) Zero order; (b) First order; (c) Hixon–Crowell; (d) Korsmeyer-Peppas; (e) Higuchi

**Table S1.** IC<sub>50</sub> value of DOX and DOX loaded BCPs

|                  | IC <sub>50</sub> (µg/ml) |
|------------------|--------------------------|
| <b>Free DOX</b>  | 3.759±0.162              |
| <b>BCP10-DOX</b> | 7.374±0.260              |
| <b>BCP25-DOX</b> | 3.215±0.171              |
| <b>BCP50-DOX</b> | 1.748±0.103              |
